# Supplementary material
Source: HighWire-hosted journal article supplement (https://bmjopen.bmj.com/content/9/4/e026443)
Supplement: inline-supplementary-material-1 [file inline-supplementary-material-1.pdf]

## **Additional file 1 R-AEP criteria for county hospitalisation**

---

### **A. Needed medical service**

---

1. Need surgery or follow-up treatment within 24 hours: (1) local anesthesia or general anesthesia; and/or (2) instruments or other facilities that are only available for hospitalized patients (angiography, visceral biopsy)
  2. Treatment with varying dosage or drug on a regular basis under direct medical supervision
  3. Calculation of intake and output volume
  4. Operation to be conducted on the following day in the operating room, detailed pre-operative consultation or evaluation on the day of admission
  5. Main surgical incision and drainage nursing
  6. Quarantined patients
  7. Bedside electrocardiogram (ECG) monitoring or testing vital signs at least every 2 hours
  8. Stopping (at least once every 8 hours) or continuing oxygen inhalation
  9. Referral of post-operative recovery
- 

### **B. Severity of illness**

---

1. Continuous fever  $>38.0^{\circ}\text{C}$  for more than 5 days
  2. Acute confusion (coma or adipsoria)
  3. Severe anomaly in electrolyte or blood and vigor, showing the following situations: (1)  $\text{Na} < 123 \text{ mEq/L}$  or  $> 156 \text{ mEq/L}$ ; (2)  $\text{K} < 2.5 \text{ mEq/L}$  or  $> 6.0 \text{ mEq/L}$ ; (3)  $\text{HCO}_3 < 20 \text{ mEq/L}$  or  $> 36 \text{ mEq/L}$ ; and (4) arterial blood  $\text{pH} < 7.30$  or  $> 7.45$
  4. Loss of sight or hearing for 48 hours
  5. Loss of activity in any part of the body for 48 hours
  6. Excretion disorder or absence of intestinal peristalsis in the past 24 hours
  7. Active bleeding
  8. Needing blood transfusion because of bleeding
  9. Mental disorders caused by non-alcohol dependence
  10. Viscera removal or surgical wound dehiscence
  11. Pulse less than 50 times or greater than 140 times per minute
  12. Abnormal blood pressure: systolic blood pressure  $< 90 \text{ mmHg}$  or  $> 200 \text{ mmHg}$  and/or diastolic blood pressure  $< 60 \text{ mmHg}$  or  $> 120 \text{ mmHg}$
  13. Ventricular fibrillation or acute myocardial ischemia shown by electrocardiogram (ECG) report or course log
  14. Acute blood disorder, severe medium-sized leukopenia, thrombocytopenia, leukocytosis, erythrocytosis, thrombocytosis or hemolysis-resulted symptoms
  15. Progressive acute neurological disorders
  16. Soft tissue injuries affecting basic self-care
  17. Acute myocardial infarction or cerebrovascular accident (stroke)
  18. Spinal cord lesions
  19. Lung infection above 40% or leafy lesions according to X-ray examination
  20. Hyperemesis or acute pain at acute attack by chronic diseases
  21. Burns occurred in specific areas
-
