# Supplementary material
Source: HighWire-hosted journal article supplement (https://bmjopen.bmj.com/content/9/4/e026443)
Supplement: inline-supplementary-material-2 [file inline-supplementary-material-2.pdf]

**Additional file 2 NRCMS reimbursement policies in the survey areas in 2017**

| County   | R <sub>o</sub>     |          | R <sub>i</sub>     |     |         |                  |     |         | APL(RMB) |
|----------|--------------------|----------|--------------------|-----|---------|------------------|-----|---------|----------|
|          | township hospitals |          | township hospitals |     |         | county hospitals |     |         |          |
|          | RR                 | APL(RMB) | Deductible         | RR  | PL(RMB) | Deductible       | RR  | PL(RMB) |          |
| Yilong   | 60%                | 120      | 100                | 90% | -       | 400              | 75% | -       | 180000   |
| Huining  | 60%                | 300      | 150                | 90% | 3000    | 500              | 85% | 20000   | 80000    |
| Dingyuan | 45%                | 150      | 150                | 90% | -       | 620              | 85% | -       | 200000   |
| Weiyuan  | 90%                | 110      | 150                | 80% | 3000    | 500              | 70% | 15000   | 80000    |

Note: R<sub>o</sub>, Reimbursement of Outpatient; R<sub>i</sub>, Reimbursement of Inpatient.

RR, Reimbursement ratio; APL, Annual payment limitation; PL, payment limitation of each time.
